# Supplementary material for: How Electrical Heterogeneity Parameters of Ion-Exchange Membrane Surface Affect the Mass Transfer and Water Splitting Rate in Electrodialysis
Source: Int J Mol Sci. 2020 Feb 1;21(3):973. doi: 10.3390/ijms21030973 (PMC7037469; doi:10.3390/ijms21030973)
Supplement: Supplementary file 1 [file ijms-21-00973-s001.pdf]

## Calculations of the limiting current density and the transition time

The electro dialysis cell (1) design (in particular, the special input and output devices of the solution) provide a laminar flow of the solution in the intermembrane space [63]. The laminarity of the hydraulic regime was proved by using CFD simulations and by comparing the experimental limiting current density with the value calculated using the L  v  que equation, which was deduced under the assumption of laminar flow in the intermembrane space [63].

The theoretical limiting current density,  $i_{\text{lim}}^{\text{th}}$ , which is achieved in the absence of coupled effects of concentration polarization (such as electroconvection, gravitational convection, and water splitting) can be calculated by the L  v  que equation [53]:

$$i_{\text{lim}}^{\text{th}} = \frac{FDz_1C_1}{h(T_1 - t_1)} \left[ \left( 1.47 \frac{h^2 V}{LD} \right)^{1/3} - 0.2 \right] \quad (1)$$

where  $F$  is the Faraday constant;  $D$  is the electrolyte diffusion coefficient;  $z_1$  and  $C_1$  are the charge and the input molar concentration of the counterion;  $T_1$  and  $t_1$  are the effective transport number of the counterion ( $\text{Cl}^-$  in the considered cases) in the membrane and its transport number in solution;  $V$  is the average linear flow velocity;  $L$  is the length of the desalination path;  $h$  is the intermembrane distance.

The parameters used in the experiments (at 20   C) are as follows:  $D=1.425 \cdot 10^{-9} \text{ m}^2/\text{s}$ ,  $T_1$  is assumed to be 1,  $t_1$  is 0.605,  $V$  is  $0.38 \text{ cm} \cdot \text{s}^{-1}$ ,  $h$  is 6.5 mm, and  $L$  is 2 cm. The value calculated from Eq. (1) for these experimental conditions is  $2.8 \text{ mA} \cdot \text{cm}^{-2}$ .

The limiting current density  $i_{\text{lim}}^{\text{th}}$  is related to the diffusion layer effective thickness,  $\delta$ , by the Peers equation [64]:

$$i_{\text{lim}}^{\text{th}} = \frac{FDz_1C_1}{\delta(T_1 - t_1)} \quad (2)$$

A combination of Eqs. (1) and (2) gives  $\delta$  equal to 250   m.

To compare chronopotentiograms of different membrane systems, it is convenient to use the reduced potential drop  $\Delta\phi'$  [54] instead of the total potential drop,  $\Delta\phi$ :

$$\Delta\varphi' = \Delta\varphi - \Delta\varphi_{ohm} \quad (3)$$

where the ohmic potential drop,  $\Delta\varphi_{ohm}$ , of the unpolarized membrane system is found by the extrapolation in the  $\Delta\varphi - \sqrt{t}$  coordinates to zero time (the time of the current switch-on).

The theoretical transition time,  $\tau_{Sand}$ , is found using the Sand equation [49]:

$$\tau_{Sand} = \frac{\pi D}{4} \left( \frac{Fz_1C_1}{T_1 - t_1} \right)^2 \frac{1}{i^2} \quad (4)$$

Eq. (4) allows estimating the transition time in the case where the membrane surface is homogeneous and smooth, and electrolyte transfer is governed only by electro-diffusion.

The experimental current-voltage curves are plotted in the coordinates of the ratio of the current density to its theoretical limiting value  $i/i_{lim}^{th}$  versus the reduced potential drop  $\Delta\varphi'$ . In this case  $\Delta\varphi'$  is related to the measured potential drop as

$$\Delta\varphi' = \Delta\varphi - iR_{i=0} \quad (5)$$

where  $\Delta\varphi$  is the measured value of potential drop at a current density  $i$  and  $R_{i=0} = (\partial\Delta\varphi / \partial i)_{i \rightarrow 0}$  is the resistance of the membrane system at  $i \rightarrow 0$ .
